1 **Individual differences in representational similarity of first and second languages in the**  
2 **bilingual brain**

3

4 Emily S. Nichols<sup>a</sup>, Yue Gao<sup>b</sup>, Sofia Fregni<sup>c</sup>, Li Liu<sup>b</sup>, Marc F. Joanisse<sup>d,e</sup>

5

6 <sup>a</sup>Faculty of Education, the University of Western Ontario, London, Canada

7 <sup>b</sup>State Key Laboratory of Cognitive Neuroscience and Learning, Beijing Normal University,

8 Beijing, China

9 <sup>c</sup>Faculty of Psychology, Dresden University of Technology, Dresden, Germany

10 <sup>d</sup>Department of Psychology, The University of Western Ontario, London, Canada

11 <sup>e</sup>Brain and Mind Institute, The University of Western Ontario, London, Canada

12

13

14 Corresponding authors:

15 Emily Nichols

16 Faculty of Education

17 University of Western Ontario

18 London, Ontario, Canada, N6A 5C2

19 Email: [enicho4@uwo.ca](mailto:enicho4@uwo.ca)

20 Li Liu

21 State Key Laboratory of Cognitive Neuroscience and Learning

22 Beijing Normal University

23 No.19 Xijiekou Wai St, Haidian District,

24 Beijing, China, 100875

25 Email: [lilyliu@bnu.edu.cn](mailto:lilyliu@bnu.edu.cn)

26

27 Abstract

28 Current theories of bilingualism disagree on the extent to which separate brain regions  
29 are used to maintain or process one's first and second language. The present study took a novel  
30 multivariate approach to address this question. We examined whether bilinguals maintain distinct  
31 neural representations of two languages; specifically, we tested whether brain areas that are  
32 involved in processing word meaning in either language are reliably representing each language  
33 differently, and whether language representation is influenced by individual differences in  
34 proficiency level and age of acquisition of L2. Thirty-one English-Mandarin bilingual adults  
35 performed a picture-word matching task in both languages. We then used representational  
36 similarity analysis to examine which brain regions reliably showed different patterns of activity  
37 for each language. As a group, there were no regions that reliably represented languages  
38 distinctly. However, both proficiency and age of acquisition predicted dissimilarity between  
39 language representations in several brain areas within the language network as well as several  
40 regions of the ventral visual pathway, demonstrating that top-down language knowledge and  
41 individual language experience shapes concept representation in the processing stream. The  
42 results support the model of an integrated language system in bilinguals, along with a novel  
43 description of how representations for each language change with proficiency level and L2 age  
44 of acquisition.

45 Keywords: bilingualism, word recognition, representational similarity analysis, individual  
46 differences

47

48 **1. Introduction**

49 Current theories of bilingual language processing hold that bilingual speakers coactivate  
50 their two languages during speech, and that they maintain similar, overlapping representations  
51 for both<sup>1-4</sup>. Additionally, past neuroimaging research has provided much evidence that a second  
52 language (L2) is processed similarly to the speaker's first language<sup>5-9</sup>. Even when L1-L2  
53 differences exist, such as more extensive activity in L2<sup>10,11</sup>, there remains extensive overlap<sup>6</sup>.  
54 This suggests that similar underlying language networks are engaged regardless of which  
55 language is being used. The concept of language coactivation in bilinguals is widely accepted, as  
56 is that of a single, integrated lexicon<sup>12,13</sup>. While neuroimaging provides much support for an  
57 integrated lexicon through activation of similar structures, the separation of patterns of activity  
58 within the shared L1/L2 brain areas may provide evidence for some degree of distinction  
59 between L1 and L2 lexicons.

60 Despite L1 and L2 sharing a network of structures, traditional univariate contrasts cannot  
61 tell us how languages are being represented in those areas, and while there is extensive overlap  
62 in brain areas that represent L1 and L2<sup>6,7,9,14</sup>, how the languages are represented may vary. That  
63 is, regions coding for language-specific information, such as spoken codes (e.g., left superior  
64 temporal gyrus and left inferior frontal gyrus) may represent each language differently. In  
65 contrast, regions involved in executive and attentional control (e.g., dorsolateral prefrontal cortex  
66 and insula) are likely to show less differentiation in how each language is represented as the  
67 function of these regions should not differ qualitatively from one language to another. Individual  
68 differences in language ability and experience also play an important role in bilingual language  
69 processing<sup>11,15,16</sup>, and may affect the integration of the neural representation of each language.  
70 Previous research indicates that low proficiency speakers and late L2 learners have greater

71 separation of their two languages' conceptual knowledge<sup>17</sup>, and this separation may also be  
72 reflected in the neural representation of words and concepts within co-activated brain areas.

73 Representational Similarity Analysis (RSA) is an fMRI analysis technique relying on  
74 reproducible spatial patterns of activity that correlate with distinct experimental conditions<sup>18</sup>,  
75 and has been used in the past to identify regions that differentiate between languages during  
76 reading<sup>19</sup>. RSA has been used to reveal differences between conditions within individual brain  
77 regions that were previously undetectable using standard univariate methods; it reveals cortical  
78 patterns sensitive to differences in stimuli even when the degree of activation is similar<sup>20–23</sup>.

79 This technique may be particularly relevant to describing bilingual word processing, as it has the  
80 potential to identify differences between languages that were previously thought to not exist.

81 RSA allows us to examine possible language-processing differences in areas that are assumed to  
82 be engaged similarly for both languages, suggesting that they are representing L1 and L2  
83 differently. Additionally, by measuring individual differences in bilingual experience, it is  
84 possible to determine how the neural representation of each language changes with these  
85 measures.

## 86 **Rationale for the Present Study**

87 The present study examined whether brain areas involved in both L1 and L2  
88 representationally distinguish the two languages. English-Mandarin bilingual adults performed a  
89 lexico-semantic recognition task in each language. We then examined whether brain regions  
90 showed reliably different patterns of activity for each language within regions that significantly  
91 activated to both. We predicted that, consistent with models of an integrated bilingual lexicon,  
92 representational dissimilarity would decrease with increasing proficiency and earlier ages of L2

93 acquisition (AoA). In contrast, areas involved in domain general cognitive processes, such as  
94 executive function, were not expected to show language-selective patterns.

## 95 2. Material and methods

### 96 2.1 Participants

97 Thirty-two (13 female) neurologically healthy right-handed native speakers of English  
98 were recruited via posters and word of mouth in Beijing, China. All participants were second-  
99 language learners of Mandarin, aged 18-37 ( $M = 23.84$ ,  $SD = 4.59$ ), and had begun learning  
100 Mandarin between the ages of 0-28 years ( $M = 18.09$ ,  $SD = 7.10$ ). This study was approved by  
101 the Beijing Normal University research ethics board and all participants gave informed consent  
102 prior to participation. Demographic and language information is summarized in Table 1.

Table 1. Participant demographic and language information

| Measure                   | M (SD)             |
|---------------------------|--------------------|
| N                         | 32                 |
| Sex                       | 13 female, 19 male |
| Age (years)               | 23.84 (4.59)       |
| Age of L2 acquisition     | 18.90 (7.10)       |
| <i>Proficiency (%)</i>    |                    |
| English                   | 88.93 (5.88)       |
| Mandarin                  | 38.54 (18.15)      |
| <i>Reaction Time (ms)</i> |                    |
| English                   | 1203.60 (202.21)   |
| Mandarin                  | 1607.88 (231.78)   |
| <i>Accuracy (%)</i>       |                    |
| English                   | 94.17 (4.21)       |
| Mandarin                  | 83.07 (10.35)      |

103

### 104 2.2 Behavioral tests

105 L1 English and L2 Mandarin proficiency levels were assessed prior to scanning using a  
106 subset of 48 questions from the Test of English as a Second Language (ETS, Princeton, NJ) and

107 48 questions from the Hanyu Shuiping Kaoshi (HSK Centre, Beijing, China), respectively. Both  
108 tests consisted of three sections, grammar, reading comprehension, and vocabulary, which were  
109 combined to give a final score for each language, representing overall proficiency in these three  
110 domains.

111 Age of acquisition was obtained by self-report, defined as the age at which individuals  
112 first began learning Mandarin. To verify handedness, participants completed an abridged version  
113 of the Edinburgh Handedness Inventory<sup>24</sup>. Behavioral measures, informed consent and task  
114 instructions were administered in English, aside from the Mandarin proficiency test, which was  
115 administered in Mandarin.

### 116 **2.3 fMRI Task**

117 Participants completed a picture-word matching task during scanning, in alternating runs  
118 of English and Mandarin. Pictures were presented via LCD projector to the center of a screen  
119 mounted at the head of the scanner bore, which was viewed through a mirror placed above the  
120 head coil. At the same time, a word was played binaurally through insert earphones  
121 (Sensimetrics Corporation, Malden, MA). Participants were required to indicate as quickly as  
122 possible with a button press whether the picture and word matched. Each picture was visible for  
123 2.5 s. They viewed a fixation crosshair between trials as baseline. Stimulus presentation and  
124 response recording was controlled with E-Prime software (Psychology Software Tools, Inc.,  
125 Sharpsburg, PA) and a Windows laptop.

126 The scanning session was divided into 8 alternating English and Mandarin runs. Four  
127 English runs were interleaved with four Mandarin runs, with starting language counterbalanced,  
128 so that a run in the first language was always followed by a run in the other language. Four  
129 orderings were produced: one version starting with English, one version starting with Mandarin,

130 and an additional version of each in which runs were presented in the reverse order. Each run  
131 began with an image reminding participants of which buttons to respond with, and the language  
132 in which the next run would be performed. Each run consisted of 20 trials for a total of 160 trials  
133 (80 in each language, with 40 matching and 40 mismatching). A short break was provided  
134 between each 3.5-minute scanning run. Each image appeared twice during the experiment, once  
135 in a matching pair and once in a semantically unrelated mismatching pair. Each trial was 2.5 s in  
136 duration, with inter-trial interval jittered between 2.5 and 12.5 s in 2.5 s increments, to optimize  
137 the deconvolution of the blood oxygen level dependent signal.

138 Stimulus words consisted of 40 common single-word concepts with the constraint that  
139 they are expressed as single two-syllable words in both English and Mandarin, and have  
140 frequencies greater than 40 per million in both languages (English: CELEX Lexical Database <sup>25</sup>  
141 and Mandarin: SUBTLEX-CH <sup>26</sup>). In a separate pilot study involving different participants, we  
142 asked groups of native speakers of English or Mandarin to rate the imageability and familiarity  
143 of the stimulus words, as well as the correspondence of the pictures to target words, on a Likert  
144 scale of 1-7. Both groups showed equally high ratings on familiarity ( $M_{Mandarin} = 5.78$ ,  $M_{English} =$   
145  $5.48$ ) and picture/word correspondence ( $M_{Mandarin} = 6.08$ ,  $M_{English} = 5.95$ ).

#### 146 **2.4 Data acquisition and processing**

147 Imaging was conducted on a Siemens Magnetom TIM Trio whole-body 3 Tesla scanner  
148 with a 32-channel head coil. T2\*-weighted functional scans were acquired in the transverse plane  
149 with 45 slices per volume (TR = 2.5 s; TE = 38 ms; flip angle = 80°; FOV = 192 x 192 mm;  
150 voxel size 3x3x3 mm<sup>3</sup>) using an iPAT parallel acquisition sequence (generalized auto-calibrating  
151 partially parallel acquisition [GRAPPA]; acceleration factor = 2), providing full coverage of the  
152 cerebrum and the superior portion of the cerebellum. A total of 576 functional scans were

153 acquired for each participant over 8 runs (3.5 min per run). After the final functional run, a  
154 whole-head high-resolution 3D anatomical scan was acquired in the sagittal plane, using a 3D  
155 pulse sequence weighted for T1 contrast (MPRAGE; TR = 2.3 s; TE = 2.98 ms; FOV = 256 x  
156 256 mm; voxel size = 1 mm<sup>3</sup>; 176 slices; GRAPPA acceleration factor = 2).

157 Raw data were converted from DICOM to BIDS format and preprocessed using  
158 FMRIprep version 1.0.0<sup>27</sup> a Nipype<sup>27,28</sup> based tool. Each T1 weighted volume was corrected  
159 for bias field using N4BiasFieldCorrection v2.1.0<sup>29</sup> and skullstripped using  
160 antsBrainExtraction.sh v2.1.0 (using OASIS template). Cortical surface was estimated using  
161 FreeSurfer v6.0.0<sup>30</sup>. The skullstripped T1w volume was coregistered to skullstripped ICBM 152  
162 Nonlinear Asymmetrical template version 2009c<sup>31</sup> using nonlinear transformation implemented  
163 in ANTs v2.1.0<sup>32</sup>.

164 Functional data was slice time corrected using AFNI<sup>33</sup> and motion corrected using  
165 MCFLIRT v5.0.9<sup>34</sup>. This was followed by co-registration to the corresponding T1-weighted  
166 volume using boundary based registration 9 degrees of freedom - implemented in FreeSurfer  
167 v6.0.0<sup>35</sup>. Motion correcting transformations, T1 weighted transformation and MNI template  
168 warp were applied in a single step using antsApplyTransformations v2.1.0 with Lanczos  
169 interpolation.

170 Three tissue classes were extracted from T1w images using FSL FAST v5.0.9<sup>36</sup>. Voxels  
171 from cerebrospinal fluid and white matter were used to create a mask in turn used to extract  
172 physiological noise regressors using aCompCor<sup>37</sup>. Mask was eroded and limited to subcortical  
173 regions to limit overlap with gray matter, six principal components were estimated. Frame-wise  
174 displacement<sup>38</sup> was calculated for each functional run using Nipype implementation. For more  
175 details of the pipeline see <https://fmripred.readthedocs.io/en/latest/workflows.html>.



## 176 **2.5 First- and second-level statistics**

177           Single-subject statistical maps were formed in the context of the General Linear Model  
178 using AFNI 3dDeconvolve function. Linear trends in the functional data were removed, and  
179 first-level analysis was conducted by modeling all English trials together and all Mandarin trials  
180 together. The statistical maps were formed in the context of the General Linear Model using  
181 AFNI 3dDeconvolve function. Additional regressors were included for the six motion  
182 parameters, physiological noise from the preprocessing step, and the response times. This led to  
183 one English and one Mandarin output per subject that we used to compute the univariate  
184 contrasts. One sample t-tests against zero were then computed for each language (AFNI  
185 3dttest++) and a conjunction analysis (AFNI 3dcalc) was performed to identify areas that  
186 significantly activated for both English and Mandarin. The result was a conjunction map  
187 thresholded at 2.596 ( $p = 0.01$  uncorrected); a fairly liberal threshold was used at this stage in  
188 order to include as many areas in the search space as possible. A brain mask was then created  
189 using the results of this conjunction analysis. Finally, first-level single-subject statistics were  
190 recomputed for English and Mandarin, this time creating separate models for even and odd runs.  
191 Only correct trials were included in both first-level analyses, with accuracy ranging from 81.25%  
192 to 100% correct on the English task and ranging from 61.25% to 96.25% correct on the  
193 Mandarin task.

## 194 **2.6 Split-half correlation searchlight analysis**

195           Searchlight RSA was then performed to identify regions in which the representations of  
196 L1 and L2 were reliably different, regardless of groupwise differences in activation levels. The  
197 search space for the analysis was constrained to regions within the English-Mandarin  
198 conjunction mask, shown in Figure 1. To conduct RSA, a split-half correlation searchlight was

199 performed within the CoSMoMMPA Matlab toolbox<sup>39</sup>, using a search sphere radius of 3 voxels.  
200 Within each searchlight sphere Pearson correlations were performed for activity patterns  
201 between even and odd runs, within-language (English-English and Mandarin-Mandarin) and  
202 between-language (English-Mandarin), yielding a  $2 \times 2$  similarity matrix for each individual at  
203 each point of the searchlight. Next, the degree of dissimilarity of between-language vs. within-  
204 language patterns (on-diagonal vs. off-diagonal) was computed using a pairwise *t*-test based on  
205 the difference of Fisher-transformed mean correlations<sup>40</sup>. Significant differences in an area  
206 within the searchlight sphere indicated this region differentially encodes L1 and L2. The center  
207 of the searchlight was then moved to the next location of the search space, and the statistical  
208 analysis was repeated, ultimately yielding a statistical map of all voxels falling within the  
209 conjunction map. Analyses were performed using coefficient maps in MNI space. Once single-  
210 subject searchlight results were computed, a group statistic was created via a one-sample *t*-test,  
211 which identified voxels showing significantly greater representational similarity within-language  
212 than between-languages. Next, we computed random-effect cluster statistics corrected for  
213 multiple comparison (*cosmo\_montecarlo\_cluster\_stat*) with a mean of zero under the null  
214 hypothesis and 10,000 iterations, and significant clusters were converted to *z*-scores.

## 215 **2.7 Regression with proficiency and age of acquisition**

216 We then conducted linear regression to examine whether AoA and the difference in  
217 proficiency level between L1 and L2 predicted the degree of representational dissimilarity  
218 within-subject. Two linear models were constructed, the first with the difference in L2-L1  
219 proficiency as a continuous regressor and adjusting for AoA, the second with AoA as a  
220 continuous regressor and adjusting for the difference in L2-L1 proficiency. The minimum  
221 cluster-size threshold was determined in two steps. First, we estimated the smoothness of the

222 residuals for each subject output by 3dDeconvolve using the autocorrelation function (ACF)  
223 option (AFNI 3dFWHMx), and the mean smoothness level was calculated. Next, minimum  
224 cluster size was determined using a 10,000 iteration Monte Carlo simulation (AFNI 3dClustSim)  
225 at a voxelwise alpha level of  $p = 0.01$ , using bi-sided thresholding and first-nearest neighbour  
226 clustering. Correction for multiple comparisons at  $p = 0.01$  was achieved by setting a minimum  
227 cluster size of 7 voxels.

### 228 **3. Results**

#### 229 **3.1 Behavioural**

230 Performance on the L1 (English) proficiency test ranged from 72.92% to 100%, and  
231 performance on the L2 (Mandarin) proficiency test ranged from 12.5% to 77.08%. Analysis of  
232 the proficiency test data acquired prior to scanning indicated that L2 proficiency was  
233 significantly lower than L1 proficiency ( $M = 88.93\%$ ,  $SD = 5.88$ ,  $M = 38.54\%$ ,  $SD = 18.15$ ,  
234 respectively;  $t(31) = -15.93$ ,  $p < .001$ , 95% CI [43.94, 56.84]). L2 proficiency did not  
235 significantly correlate with L2 AoA ( $r(30) = -0.21$ ,  $p = .255$ ). Participants responded faster on  
236 English trials than Mandarin trials ( $M = 1203.60$  ms,  $SD = 202.21$ ,  $M = 1607.88$  ms,  $SD =$   
237 231.78, respectively;  $t(31) = -14.67$ ,  $p < .001$ , 95% CI [-460.48, -348.09]) and were more  
238 accurate on English trials than Mandarin trials ( $M = 94.17\%$ ,  $SD = 4.21$ ,  $M = 83.07\%$ ,  $SD =$   
239 10.35;  $t(31) = 6.84$ ,  $p < .001$ , 95% CI [7.78, 14.40]).

#### 240 **3.2 Conjunction analysis**

241 Results of the conjunction analysis are shown in Figure 1 and Table 2. Both L1 English  
242 and L2 Mandarin produced significant activation at a voxelwise  $p$ -value of 0.01 (uncorrected) in  
243 an extensive network of bilateral brain regions including the Heschl's gyrus, superior temporal  
244 gyrus (STG), inferior frontal gyrus (IFG), fusiform and lingual gyri, and occipital and parietal

245 cortices.

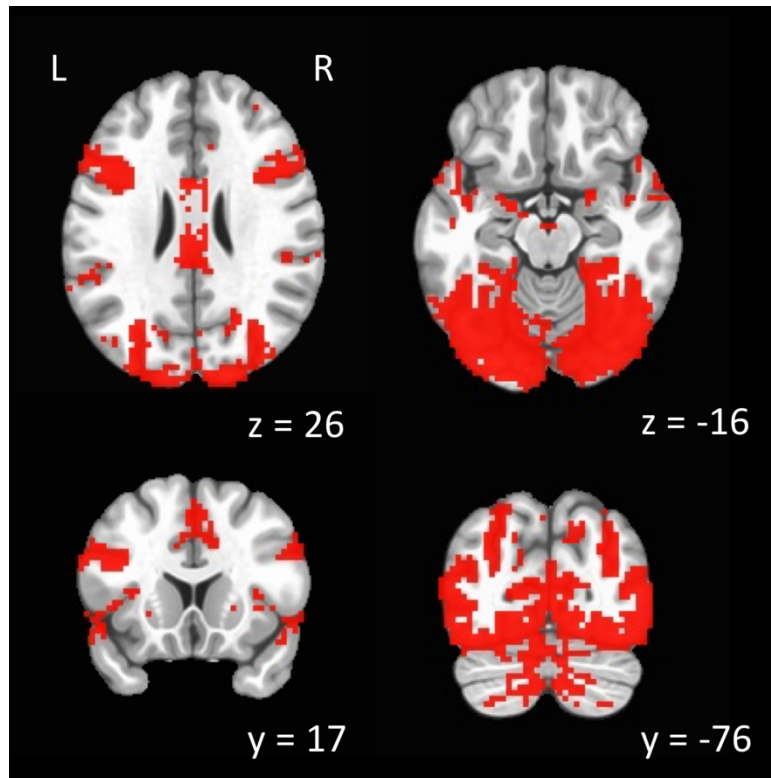

246

247 **Figure 1.** Areas that significantly activated for both L1 English and L2 Mandarin at  $p = .01$   
248 uncorrected. Results are overlaid on a stereotaxic brain in MNI space. L=Left, R= Right.

249

### 250 3.3 Searchlight with split-half correlation analysis

#### 251 3.3.1 Group-level RSA

252 As a group, no regions showed significantly greater representational similarity within-  
253 language (Mandarin-Mandarin and English-English) compared to between-language (Mandarin-  
254 English).

#### 255 3.3.2 Regression with proficiency and age of acquisition

256 In order to determine whether proficiency or AoA predicted the degree of difference in  
257 representational similarity within- and between-language, subject-wise searchlight maps were

258 submitted to linear regression. L2-L1 Proficiency difference predicted greater within-language  
259 representational similarity than between-language similarity in several areas including the left  
260 fusiform, IFG, bilateral STG, and right lingual gyrus, shown in Figure 2 and Table 3. All areas  
261 showed a positive relationship, indicating that as the difference in proficiency between languages  
262 increased, so did the degree of difference in representation between English and Mandarin.

263         The relationship between AoA and representational similarity is shown in Figure 3 and  
264 Table 3. AoA positively predicted greater within-language than between-language  
265 representational similarity in the left middle temporal gyrus and right inferior occipital gyrus,  
266 indicating that later AoAs were associated with larger differences between L1 and L2 in these  
267 areas. In contrast, AoA showed a negative correlation with the left inferior parietal lobe and right  
268 insula and calcarine sulcus, indicating that earlier AoAs were associated with smaller L1-L2  
269 representational differences in these areas.

270

271

Table 3. Regions where proficiency or AoA significantly predicted z-score

| Predictor         | Region                           | MNI         |          |          | Voxels | <i>t</i> | <i>p</i> |
|-------------------|----------------------------------|-------------|----------|----------|--------|----------|----------|
|                   |                                  | coordinates |          |          |        |          |          |
|                   |                                  | <i>x</i>    | <i>y</i> | <i>z</i> |        |          |          |
| L2-L1 Proficiency | R Cerebellum                     | 6           | -81      | -30      | 35     | 5.23     | < .001   |
|                   | L Occipital fusiform gyrus       | -33         | -75      | -18      | 96     | 4.72     | < .001   |
|                   | L Supramarginal gyrus            | -66         | -45      | 21       | 13     | 4.2      | < .001   |
|                   | L Precentral gyrus               | -33         | -9       | 66       | 12     | 4.1      | < .001   |
|                   | L Pars opercularis               | -39         | 3        | 24       | 20     | 4.07     | < .001   |
|                   | R Cerebellum                     | 33          | -66      | -48      | 25     | 4.03     | < .001   |
|                   | R Middle occipital gyrus         | 51          | -81      | 0        | 9      | 3.97     | < .001   |
|                   | L Anterior intra-parietal sulcus | -36         | -48      | 42       | 9      | 3.9      | .001     |
|                   | R Primary visual cortex          | 18          | -60      | 9        | 26     | 3.88     | .001     |
|                   | R Inferior temporal gyrus        | 48          | -51      | -24      | 12     | 3.76     | .001     |
|                   | L Lingual gyrus                  | -15         | -45      | -9       | 13     | 3.71     | .001     |
|                   | R Supramarginal gyrus            | 66          | -45      | 24       | 17     | 3.7      | .001     |
|                   | R Orbitofrontal cortex           | 33          | 33       | -3       | 10     | 3.63     | .001     |
|                   | L Pars triangularis              | -51         | 33       | 18       | 8      | 3.61     | .001     |
|                   | R Visual cortex ventral V3       | 21          | -78      | -6       | 8      | 3.51     | .001     |
| R Cerebellum      | 3                                | -57         | -45      | 7        | 3.31   | .003     |          |
| AoA               | R Visual cortex ventral V3       | 42          | -93      | -6       | 8      | 5.09     | < .001   |
|                   | L Middle temporal gyrus          | -54         | -24      | -9       | 9      | 4.34     | < .001   |
|                   | L Anterior intra-parietal sulcus | -39         | -45      | 48       | 15     | -3.5     | .002     |
|                   | R Insula                         | 39          | 21       | 0        | 16     | -3.46    | .002     |
|                   | R Calcarine sulcus               | 18          | -51      | 9        | 8      | -3.32    | .002     |

Note. Coordinates denote the location of peak activation. L/R = Left/Right.

272

273

274

275

276

277

278

279

280

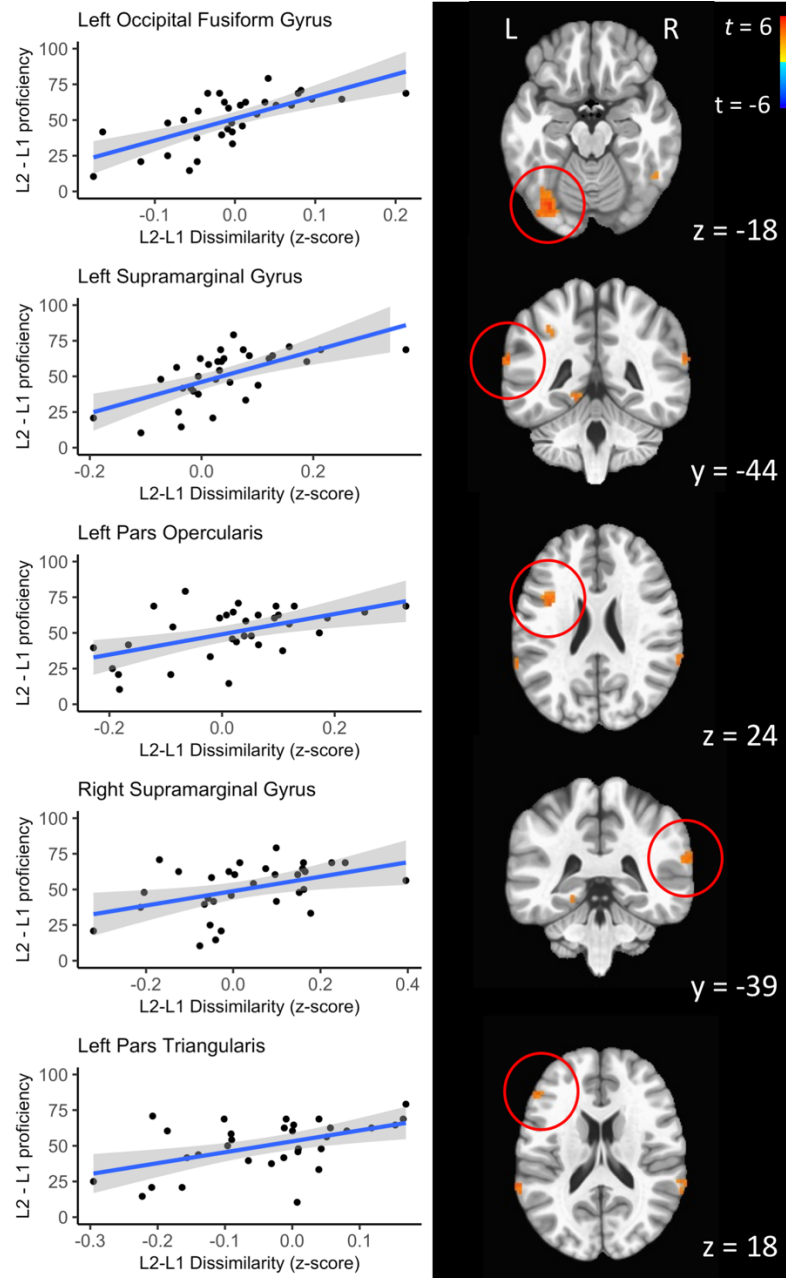

281

282

283 **Figure 2.** The relationship between difference in L2-L1 proficiency and L2-L1 similarity. Z-  
284 score values represent the mean across the entire ROI. Higher z-scores indicate greater  
285 differences between correlation values between-language vs. within-language. Statistical maps  
286 are thresholded at  $p = .01$ , overlaid on an MNI brain atlas. L = left, R = right. Cluster locations  
287 and sizes are reported in Table 3.

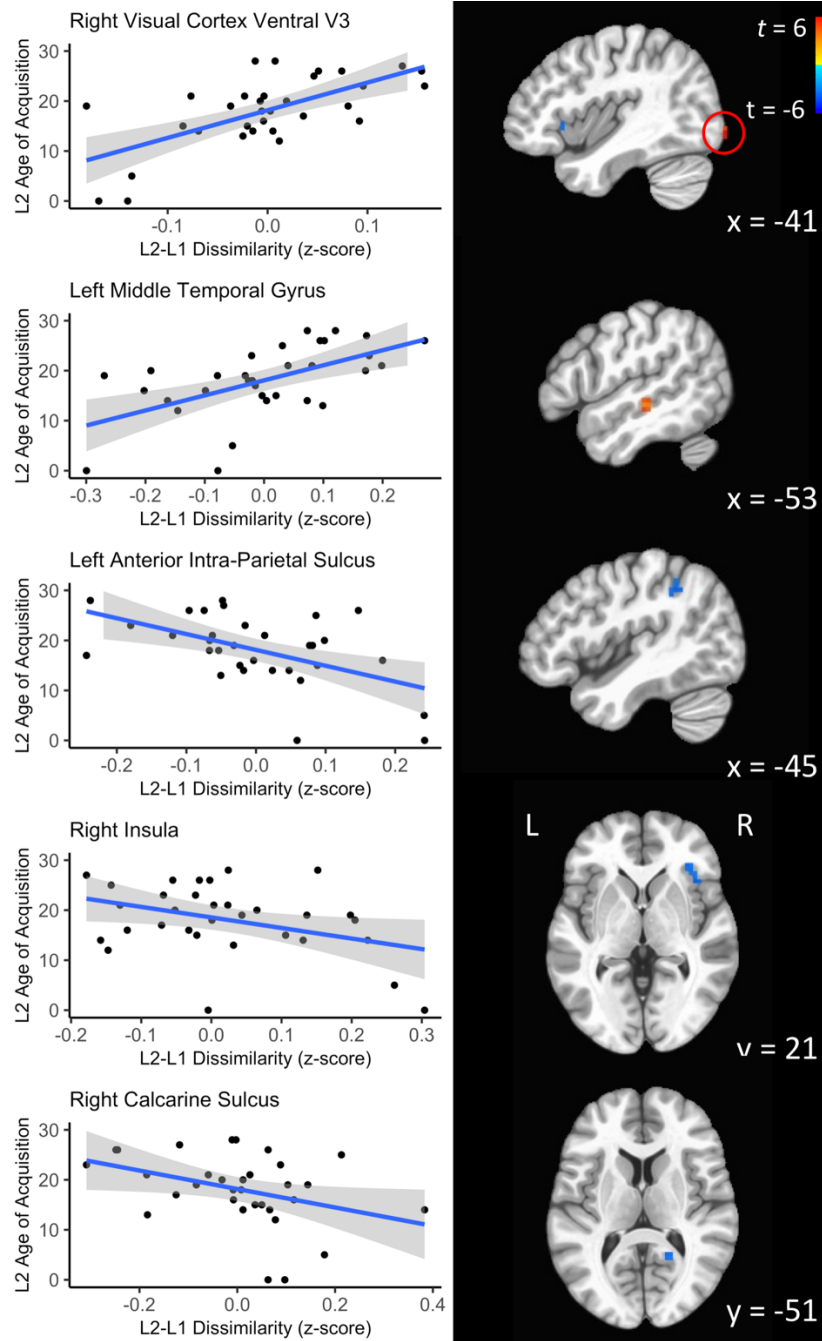

288

289 **Figure 3.** The relationship between L2 AoA and L2-L1 dissimilarity. Z-score values represent  
290 the mean across the entire ROI. Higher z-scores indicate greater differences between correlation  
291 values between-language vs. within-language. Statistical maps are thresholded at  $p = .01$ ,  
292 overlaid on an MNI brain atlas. L = left, R = right. Cluster locations and sizes are reported in  
293 Table 3.



294

#### 4. Discussion

295

The present study investigated the hypothesis that bilinguals maintain similar,

296

overlapping lexical representations for both of their languages. Using a lexico-semantic

297

recognition task, we found both similarity and dissimilarity in the representation of bilinguals'

298

two languages within the bilingual word recognition network. There were no regions that

299

significantly differed in their representation of English and Mandarin at the group level, however

300

both proficiency and AoA predicted the degree of representational similarity in several areas.

301

That is, individual differences predicted differentiation in the representation of bilinguals' two

302

languages in areas that were significantly activated during the word recognition task in both

303

Mandarin and English. These results extend behavioral and ERP findings that bilinguals have a

304

single, integrated lexicon<sup>12,41-43</sup>, demonstrating how the neural representations within activated

305

regions change with language experience. While prior meta-analyses and reviews have argued

306

this on the basis of relative intensity of fMRI activity<sup>6,12</sup>, degree of activation cannot tell us

307

about how each language is being represented.

308

Consistent with our hypotheses, several regions of the language network showed patterns

309

of representation that differentiated languages depending on individual differences. For example,

310

one of these regions was the left IFG (including both the pars opercularis and the pars

311

triangularis), an area engaged in representing and planning articulatory codes for speech and tone

312

<sup>44-47</sup>. Indeed, these features differ between English and Mandarin in that each language has

313

phonological features that are not present in the other (e.g., tone in Mandarin, consonant clusters

314

in English). The left IFG showed greater representational similarity between languages when the

315

difference between L1 and L2 proficiency was smaller, suggesting that as bilinguals become

316

more matched in proficiency across their two languages, the phonological representations

317 become more integrated. Similarly, language similarity within the bilateral supramarginal gyrus  
318 was greater with smaller proficiency differences, an area important for auditory-motor  
319 integration during word recognition <sup>48</sup>.

320 One notable result was that of representational dissimilarity in lower L2 proficiency and  
321 later AoA speakers throughout the ventral visual stream, a cortical pathway responsible for  
322 object recognition and concept representation <sup>49</sup>. The separate representation in visual areas is  
323 especially interesting as participants in the present study saw the same images in each language;  
324 the manipulation here was only the language in which they heard the names of these objects. As  
325 a result, language-dependent differences in this region indicate that this reflects a top-down  
326 modulation of high-level visual processing by the linguistic input. Although visual processing of  
327 the same images may appear to be a domain-general process, support for it being language-  
328 specific comes from the label-feedback hypothesis, which suggests that language modulates  
329 ongoing cognitive and perceptual processing <sup>50</sup>. In line with this hypothesis, each language's  
330 verbal label for the paired image influences the perception of that image. Thus, while the image  
331 remains the same, the top-down influence of the language is producing separable representations  
332 in high-level visual areas, distinguishing between the visual perception of the spoken word *table*  
333 vs. that of the spoken word 桌子 (the Mandarin word for *table*).

334 There have been numerous studies showing activation differences between L1 and L2,  
335 showing greater activation in language areas for one language versus another <sup>7,51,52</sup>, or showing  
336 additional areas recruited for L2 processing vs. L1 processing <sup>9</sup>. These differences have largely  
337 been attributed to later acquisition of L2, differences in proficiency, or other external factors  
338 affecting how L2 was acquired <sup>6,51,53</sup>. In contrast, matched bilinguals tend to show overlapping  
339 activity in language regions, with little or no differentiation between languages at the univariate

340 level<sup>54–56</sup>. L2 speakers in the present study showed experience-dependent representational  
341 differences between L1 and L2 in both the language network as well as throughout the ventral  
342 visual stream, providing further evidence for integration of bilinguals' two languages but only  
343 when speakers are matched in ability across those two languages.

#### 344 **Conclusion**

345         We investigated first and second language representation in English-Mandarin bilinguals.  
346 Using RSA, we identified both regions in which individual differences predicted differentiation  
347 in representation between English and Mandarin. Experience-modulated within-language  
348 representational similarity was present in language-network areas (e.g., portions of the left IFG)  
349 as well as several regions of the ventral visual pathway, indicating that top-down language  
350 knowledge shapes concept representation in the processing stream.

351         A logical extension of present study is the examination of representational differences in  
352 different types of second language processing. For instance, results may differ when comparing  
353 two languages that are more similar than English and Mandarin, such as Spanish and French, or  
354 when using items that vary in similarity, such as cognates and non-cognates. Additionally, word  
355 processing does not involve grammatical processing, which is also an important aspect of  
356 bilingual language processing that can differ greatly between L1 and L2. Univariate approaches  
357 that contrast degree of brain activation may miss important differences in this regard. The  
358 multivariate approach used here may thus provide a way forward in our ability to fully discern  
359 how L1 and L2 are represented in the brain.

360 Acknowledgments: We are grateful to Suzanne Witt for help with the RSA analysis.

361

362 Funding: This work was supported by an NSERC Discovery Grant to M.F.J., a National Key

363 Laboratory of Cognitive Neuroscience and Learning Open-Project Grant to M.F.J. and L.L., and

364 a China NSF Grant ([No. 31970977](#)) to L.L.

365

366 Author Statement: The authors declare no conflict of interest.

367

368 References

- 369 1. Goldrick, M., Putnam, M. & Schwarz, L. Coactivation in bilingual grammars: A  
370 computational account of code mixing. *Biling. Lang. Cogn.* **FirstView**, 1–20 (2016).
- 371 2. Pyers, E. & Emmorey, K. The Face of Bimodal Bilingualism. *Psychol. Sci.* **19**, 531–536  
372 (2008).
- 373 3. Spalek, K., Hoshino, N., Wu, Y. J., Damian, M. & Thierry, G. Speaking two languages at  
374 once: Unconscious native word form access in second language production. *Cognition*  
375 **133**, 226–231 (2014).
- 376 4. Starreveld, P. A., De Groot, A. M. B., Rossmark, B. M. M. & Van Hell, J. G. Parallel  
377 language activation during word processing in bilinguals: Evidence from word production  
378 in sentence context. *Biling. Lang. Cogn.* **17**, 1–19 (2014).
- 379 5. Cao, F., Tao, R., Liu, L., Perfetti, C. A. & Booth, J. R. High Proficiency in a Second  
380 Language is Characterized by Greater Involvement of the First Language Network:  
381 Evidence from Chinese Learners of English. *J. Cogn. Neurosci.* **25**, 1649–1663 (2013).
- 382 6. Indefrey, P. A Meta-analysis of Hemodynamic Studies on First and Second Language  
383 Processing: Which Suggested Differences Can We Trust and What Do They Mean? *Lang.*  
384 *Learn.* **56**, 279–304 (2006).
- 385 7. Perani, D. *et al.* The role of age of acquisition and language usage in early, high-proficient  
386 bilinguals: an fMRI study during verbal fluency. *Hum. Brain Mapp.* **19**, 170–82 (2003).
- 387 8. Sun, Y. *et al.* The dynamic nature of assimilation and accommodation procedures in the  
388 brains of Chinese-English and English-Chinese bilinguals. *Hum. Brain Mapp.* **36**, 4144–  
389 4157 (2015).
- 390 9. Wang, Y. *et al.* Neuromagnetic measures of word processing in bilinguals and

- 391 monolinguals. *Clin. Neurophysiol.* **122**, 1706–17 (2011).
- 392 10. Lucas, T. H., McKhann, G. M. & Ojemann, G. Functional separation of languages in the  
393 bilingual brain: a comparison of electrical stimulation language mapping in 25 bilingual  
394 patients and 117 monolingual control patients. *J. Neurosurg.* **101**, 449–457 (2004).
- 395 11. Nichols, E. S. & Joanisse, M. F. Functional activity and white matter microstructure  
396 reveal the independent effects of age of acquisition and proficiency on second-language  
397 learning. *Neuroimage* **143**, 15–25 (2016).
- 398 12. van Heuven, W. J. B. & Dijkstra, T. Language comprehension in the bilingual brain: fMRI  
399 and ERP support for psycholinguistic models. *Brain Res. Rev.* **64**, 104–122 (2010).
- 400 13. Zeng, T., Branigan, H. P. & Pickering, M. J. Do bilinguals represent between-language  
401 relationships beyond the word level in their lexicon? *J. Neurolinguistics* **55**, 100892  
402 (2020).
- 403 14. Chee, M. W. L., Tan, E. W. L. & Thiel, T. Mandarin and English Single Word Processing  
404 Studied with Functional Magnetic Resonance Imaging. *J. Neurosci.* **19**, 3050–3056  
405 (1999).
- 406 15. Nichols, E. S. & Joanisse, M. F. Individual differences predict ERP signatures of second  
407 language learning of novel grammatical rules. *Biling. Lang. Cogn.* 1–15 (2017).  
408 doi:10.1017/S1366728917000566
- 409 16. Newman, A. J., Tremblay, A., Nichols, E. S., Neville, H. J. H. J. & Ullman, M. T. M. T.  
410 The Influence of Language Proficiency on Lexical Semantic Processing in Native and  
411 Late Learners of English. *J. Cogn. Neurosci.* **24**, 1205–1223 (2012).
- 412 17. Van Hell, J. G. & Tanner, D. Second Language Proficiency and Cross-Language Lexical  
413 Activation. *Lang. Learn.* **62**, 148–171 (2012).

- 414 18. Kriegeskorte, N., Mur, M. & Bandettini, P. Representational similarity analysis -  
415 connecting the branches of systems neuroscience. *Front. Syst. Neurosci.* **2**, 4 (2008).
- 416 19. Xu, M., Baldauf, D., Chang, C. Q., Desimone, R. & Tan, L. H. Distinct Distributed  
417 patterns of neural activity are associated with two languages in the bilingual brain. *Sci.*  
418 *Adv.* **3**, (2017).
- 419 20. Connolly, A. C. *et al.* The representation of biological classes in the human brain. *J.*  
420 *Neurosci.* **32**, 2608–18 (2012).
- 421 21. Ejaz, N., Hamada, M. & Diedrichsen, J. Hand use predicts the structure of representations  
422 in sensorimotor cortex. *Nat. Neurosci.* **103**, 1–10 (2015).
- 423 22. Fabbri, S., Stubbs, K. M., Cusack, R. & Culham, J. C. Disentangling Representations of  
424 Object and Grasp Properties in the Human Brain. *J. Neurosci.* **36**, 7648–62 (2016).
- 425 23. Joanisse, M. F. & DeSouza, D. D. Sensitivity of human auditory cortex to rapid frequency  
426 modulation revealed by multivariate representational similarity analysis. *Front. Neurosci.*  
427 **8**, 1–10 (2014).
- 428 24. Oldfield, R. C. The assessment and analysis of handedness: The Edinburgh inventory.  
429 *Neuropsychologia* **9**, 97–113 (1971).
- 430 25. Baayen, R. H., Piepenbrock, R. & Gulikers, L. CELEX2 LDC96L14. Web Download.  
431 *Philadelphia: Linguistic Data Consortium* (1995). doi:10.3758/BF03195456
- 432 26. Cai, Q. & Brysbaert, M. SUBTLEX-CH: Chinese Word and Character Frequencies Based  
433 on Film Subtitles. *PLoS One* **5**, e10729 (2010).
- 434 27. Gorgolewski, K. J. *et al.* Nipype. (2018). doi:10.5281/zenodo.596855
- 435 28. Gorgolewski, K. J. *et al.* Nipype: A Flexible, Lightweight and Extensible Neuroimaging  
436 Data Processing Framework in Python. *Front. Neuroinform.* **5**, 13 (2011).

- 437 29. Tustison, N. J. *et al.* N4ITK: Improved N3 bias correction. *IEEE Trans. Med. Imaging* **29**,  
438 1310–1320 (2010).
- 439 30. Dale, A. M., Fischl, B. & Sereno, M. I. Cortical surface-based analysis. I. Segmentation  
440 and surface reconstruction. *Neuroimage* **9**, 179–194 (1999).
- 441 31. Fonov, V. S., Evans, A. C., McKinstry, R. C., Almlí, C. R. & Collins, D. L. Unbiased  
442 nonlinear average age-appropriate brain templates from birth to adulthood. *Neuroimage*  
443 **47**, S102 (2009).
- 444 32. Avants, B. B., Epstein, C. L., Grossman, M. & Gee, J. C. Symmetric diffeomorphic image  
445 registration with cross-correlation: Evaluating automated labeling of elderly and  
446 neurodegenerative brain. *Med. Image Anal.* **12**, 26–41 (2008).
- 447 33. Cox, R. W. AFNI: Software for Analysis and Visualization of Functional Magnetic  
448 Resonance Neuroimages. *Comput. Biomed. Res.* **29**, 162–173 (1996).
- 449 34. Jenkinson, M., Bannister, P., Brady, M. & Smith, S. Improved Optimization for the  
450 Robust and Accurate Linear Registration and Motion Correction of Brain Images.  
451 *Neuroimage* **17**, 825–841 (2002).
- 452 35. Greve, D. N. & Fischl, B. Accurate and robust brain image alignment using boundary-  
453 based registration. *Neuroimage* **48**, 63–72 (2009).
- 454 36. Zhang, Y., Brady, M. & Smith, S. Segmentation of brain MR images through a hidden  
455 Markov random field model and the expectation-maximization algorithm. *IEEE Trans.*  
456 *Med. Imaging* **20**, 45–57 (2001).
- 457 37. Behzadi, Y., Restom, K., Liu, J. & Liu, T. T. A component based noise correction  
458 method (CompCor) for BOLD and perfusion based fMRI. *Neuroimage* **37**, 90–101 (2007).
- 459 38. Power, J. D., Schlaggar, B. L. & Petersen, S. E. Studying Brain Organization via



- 460 Spontaneous fMRI Signal. *Neuron* **84**, 681–696 (2014).
- 461 39. Oosterhof, N. N., Connolly, A. C. & Haxby, J. V. CoSMoMVPA: multi-modal  
462 multivariate pattern analysis of neuroimaging data in Matlab / GNU Octave. *Front.*  
463 *Neuroinform.* 047118 (2016). doi:10.1101/047118
- 464 40. Haxby, J. V *et al.* Distributed and Overlapping Representations of Faces and Objects in  
465 Ventral Temporal Cortex. *Science (80-. )*. **293**, 2425–2430 (2001).
- 466 41. Ando, E., Matsuki, K., Sheridan, H. & Jared, D. The locus of Katakana–English masked  
467 phonological priming effects. *Biling. Lang. Cogn.* **18**, 101–117 (2015).
- 468 42. Jouravlev, O., Lupker, S. J. & Jared, D. Cross-language phonological activation: Evidence  
469 from masked onset priming and ERPs. *Brain Lang.* **134**, 11–22 (2014).
- 470 43. Midgley, K. J., Holcomb, P. J., van Heuven, W. J. B. & Grainger, J. An  
471 electrophysiological investigation of cross-language effects of orthographic neighborhood.  
472 *Brain Res.* **1246**, 123–135 (2008).
- 473 44. Broca, P. Sur le siège de la faculté du langage articulé. *Bull. la Société d'anthropologie*  
474 *Paris* **6**, 377–393 (1865).
- 475 45. Fedorenko, E., Fillmore, P., Smith, K., Bonilha, L. & Fridriksson, J. The superior  
476 precentral gyrus of the insula does not appear to be functionally specialized for  
477 articulation. *J. Neurophysiol.* **113**, 2376–82 (2015).
- 478 46. Wise, R. J., Greene, J., Buchel, C. & Scott, S. K. Brain regions involved in articulation.  
479 *Lancet* **353**, 1057–1061 (1999).
- 480 47. Gao, Z., Guo, X., Liu, C., Mo, Y. & Wang, J. Right inferior frontal gyrus: An integrative  
481 hub in tonal bilinguals. *Hum. Brain Mapp.* **41**, 2152–2159 (2020).
- 482 48. Catani, M., Jones, D. K. & Ffytche, D. H. Perisylvian language networks of the human

- 483 brain. *Ann. Neurol.* **57**, 8–16 (2005).
- 484 49. Martin, C. B., Douglas, D., Newsome, R. N., Man, L. L. Y. & Barense, M. D. Integrative  
485 and distinctive coding of perceptual and conceptual object features in the ventral visual  
486 stream. *Elife* 1–29 (2018). doi:10.1101/186924
- 487 50. Lupyan, G. Linguistically modulated perception and cognition: The label-feedback  
488 hypothesis. *Front. Psychol.* **3**, 1–13 (2012).
- 489 51. Chee, M. W. L., Hon, N., Lee, H. L. & Soon, C. S. Relative language proficiency  
490 modulates BOLD signal change when bilinguals perform semantic judgments.  
491 *Neuroimage* **13**, 1155–1163 (2001).
- 492 52. Ding, G. *et al.* Neural mechanisms underlying semantic and orthographic processing in  
493 Chinese-English bilinguals. *Neuroreport* **14**, 1557–1562 (2003).
- 494 53. De Bleser, R. *et al.* The organisation of the bilingual lexicon: A PET study. *J.*  
495 *Neurolinguistics* **16**, 439–456 (2003).
- 496 54. Hernandez, A. E., Martinez, A. & Kohnert, K. In Search of the Language Switch: An  
497 fMRI Study of Picture Naming in Spanish–English Bilinguals. *Brain Lang.* **73**, 421–431  
498 (2000).
- 499 55. Hernandez, A. E., Dapretto, M., Mazziotta, J. & Bookheimer, S. Language switching and  
500 language representation in Spanish-English bilinguals: an fMRI study. *Neuroimage* **14**,  
501 510–20 (2001).
- 502 56. Rodriguez-Fornells, A. *et al.* Second language interferes with word production in fluent  
503 bilinguals: brain potential and functional imaging evidence. *J. Cogn. Neurosci.* **17**, 422–  
504 433 (2005).
- 505
